# Supplementary material for: Spatial-Temporal Distribution and Variation of NO2 and Its Sources and Chemical Sinks in Shanxi Province, China
Source: MDPI journal article supplement (doi:10.3390/atmos13071096), 2022-07-12
Supplement: s1 [file s1]

# Supplementary Materials:

Hongyan Li <sup>1,\*</sup>, Jin Zhang <sup>1</sup>, Biao Wen <sup>1</sup>, Shidan Huang <sup>1</sup>, Shuqin Gao <sup>1</sup>, Hongyu Li <sup>2,\*</sup>, Zhixin Zhao <sup>1</sup>, Yanru Zhang <sup>1</sup>, Guo Fu <sup>1</sup>, Jingai Bai <sup>3</sup>, Yang Cui <sup>1</sup>, Qiusheng He <sup>1</sup>

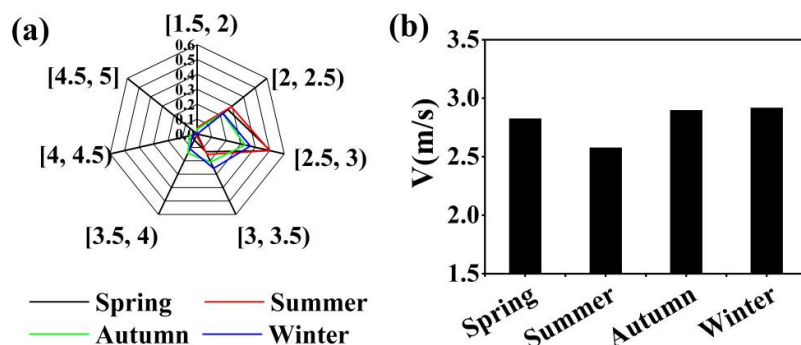

**Figure S1.** Annual wind speed chart of Lvliang City in 2018. (a) shows the frequency distribution of wind speed in four seasons, (b) shows the average wind speed in different seasons.

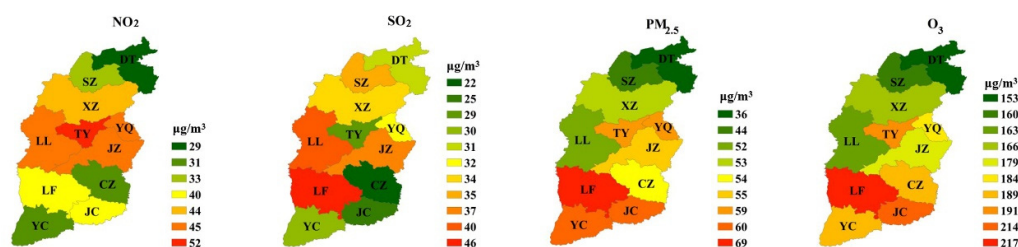

**Figure S2.** The spatial distribution of the annual average concentrations of  $NO_2$ ,  $SO_2$ ,  $PM_{2.5}$  and  $O_3$  in Shanxi province. The data are from Shanxi Statistical Yearbook-2018 [1].

Reference:

[1] Shanxi Statistical Yearbook-2018. Available from: <http://tjj.shanxi.gov.cn/tjsj/tjnj/nj2018/indexch.htm> (accessed on 2019).

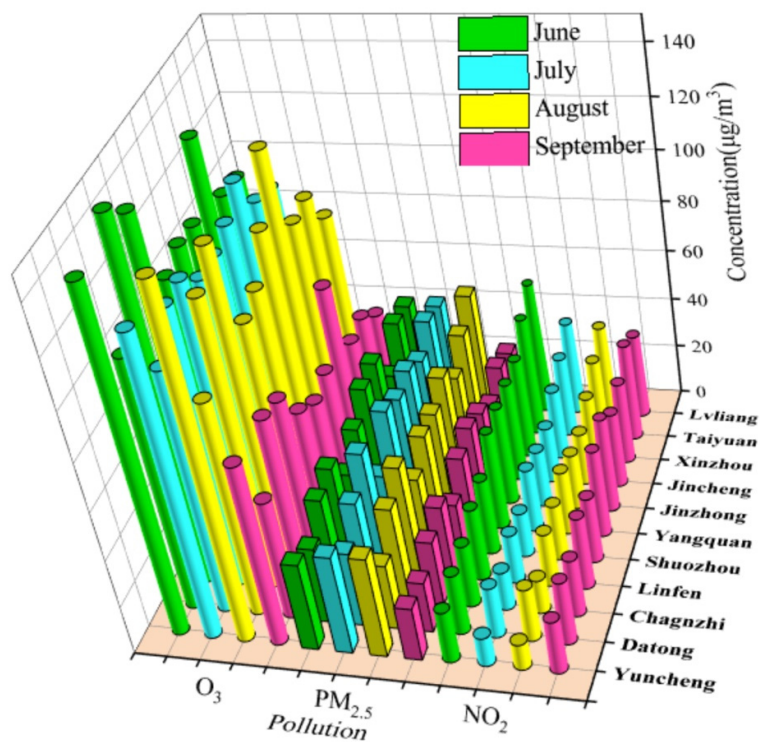

**Figure S3.** The monthly average concentrations of  $\text{NO}_2$ ,  $\text{PM}_{2.5}$  and  $\text{O}_3$  in different cities in the high-incidence months (June, July, August and September) of  $\text{O}_3$  pollution.

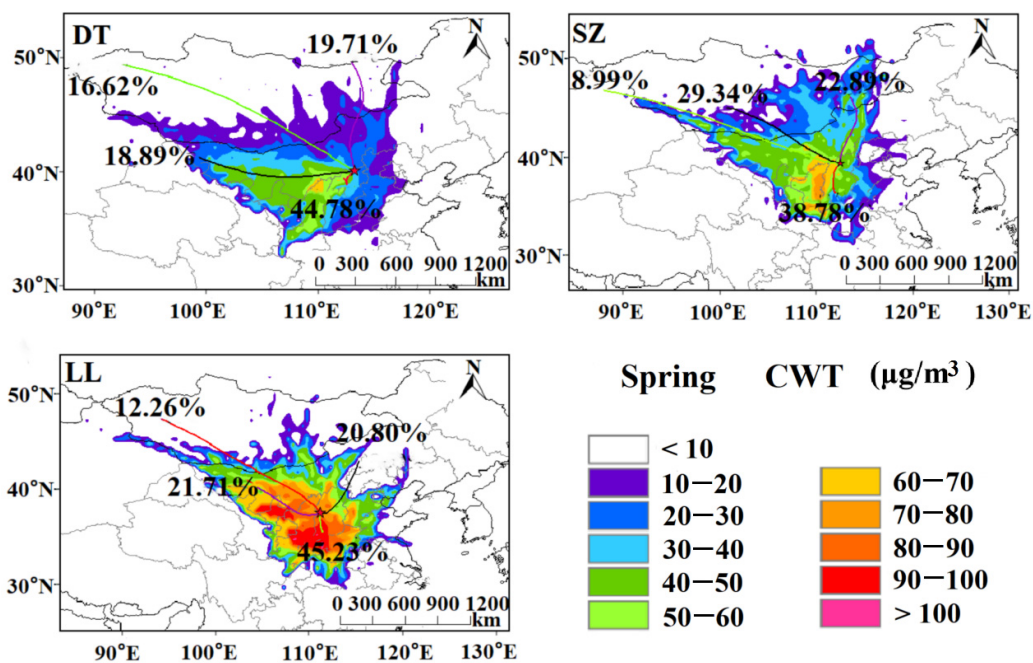

**Figure S4.** CWT maps for  $\text{NO}_2$  by mass concentration ( $\mu\text{g}/\text{m}^3$ ) in spring in the cities without over-standard days.

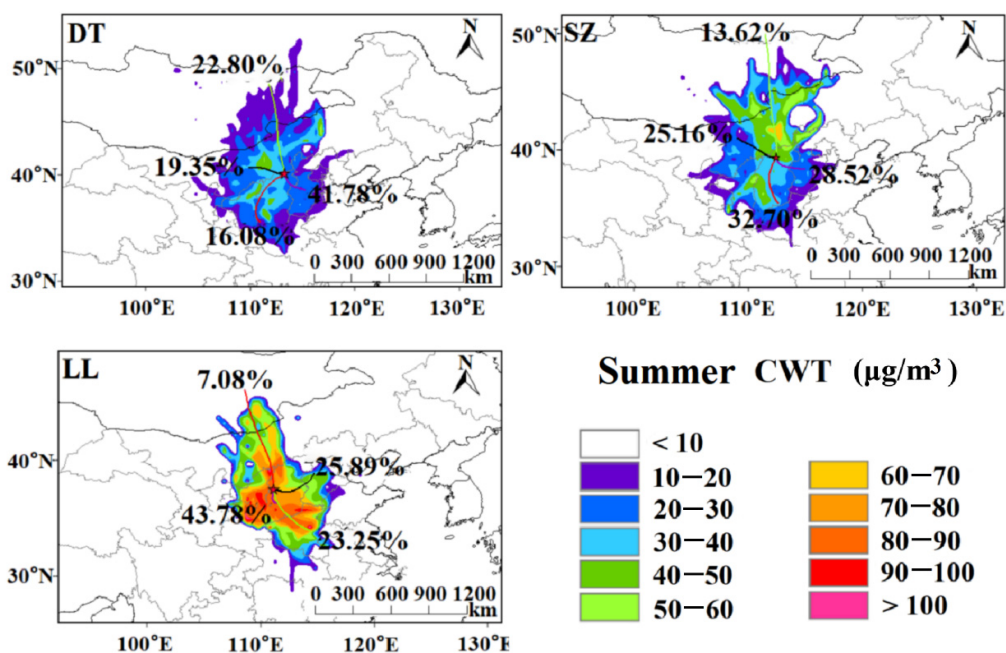

Figure S5. CWT maps for  $\text{NO}_2$  by mass concentration ( $\mu\text{g}/\text{m}^3$ ) in summer in the cities without over-standard days.

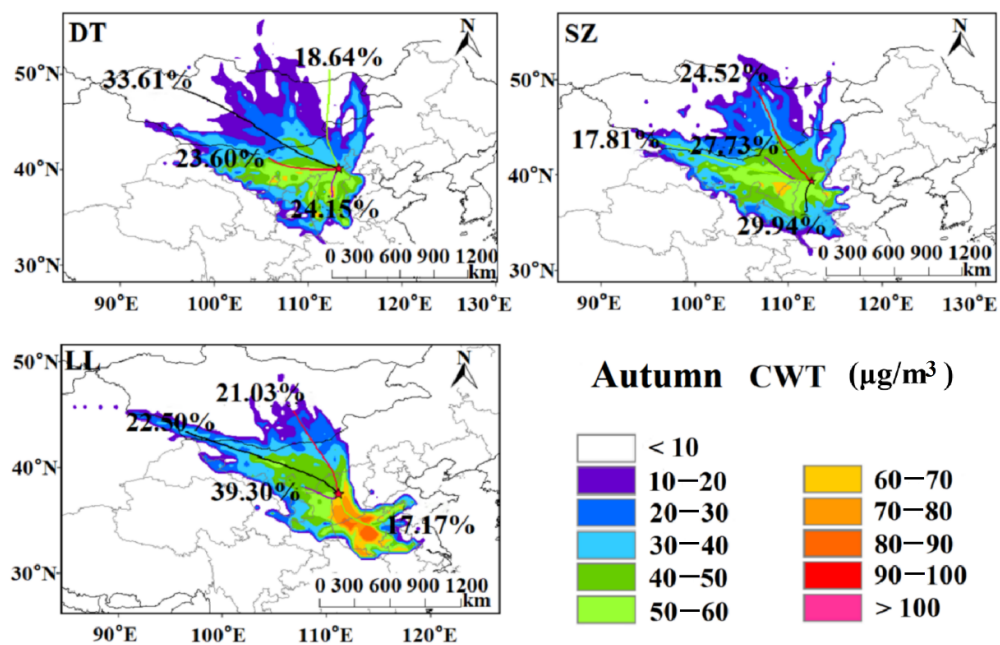

Figure S6. CWT maps for  $\text{NO}_2$  by mass concentration ( $\mu\text{g}/\text{m}^3$ ) in autumn in the cities without over-standard days.

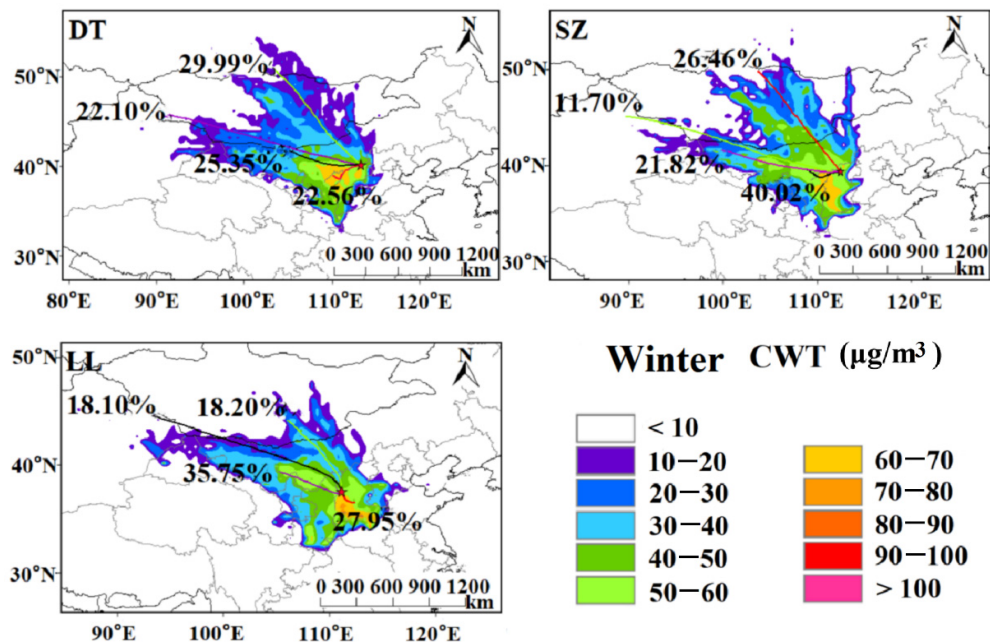

**Figure S7.** CWT maps for NO<sub>2</sub> by mass concentration ( $\mu\text{g}/\text{m}^3$ ) in winter in the cities without over-standard days.

**Table S1.** Summary of meteorological parameters in the prefectural cities in Shanxi.-: No data.

| City | WS (m/s) |        |        |        | Precipitation (mm) |        |        |        | T (°C) |        |        |        |
|------|----------|--------|--------|--------|--------------------|--------|--------|--------|--------|--------|--------|--------|
|      | Spring   | Summer | Autumn | Winter | Spring             | Summer | Autumn | Winter | Spring | Summer | Autumn | Winter |
| TY   | 2.93     | 2.34   | 2.01   | 2.14   | 54.90              | 247.20 | 59.20  | 1.30   | 14.80  | 24.51  | 10.94  | -2.92  |
| DT   | 2.94     | 2.09   | 2.41   | 2.27   | 111.60             | 253.90 | 85.10  | 6.40   | 11.52  | 22.46  | 6.56   | -9.14  |
| CZ   | 3.82     | 2.92   | 3.01   | 2.85   | -                  | -      | -      | -      | -      | -      | -      | -      |
| LF   | 1.69     | 1.57   | 1.29   | 1.33   | -                  | -      | -      | -      | -      | -      | -      | -      |
| YQ   | 2.37     | 1.77   | 1.98   | 2.00   | -                  | -      | -      | -      | -      | -      | -      | -      |
| JC   | 2.33     | 2.17   | 2.11   | 1.84   | 202.20             | 245.90 | 100.90 | 23.60  | 15.09  | 25.71  | 13.60  | -0.59  |
| SZ   | 1.93     | 1.43   | 1.55   | 1.58   | -                  | -      | -      | -      | -      | -      | -      | -      |
| JZ   | 2.93     | 2.34   | 2.01   | 2.14   | 54.90              | 247.20 | 59.20  | 1.30   | 14.80  | 24.51  | 10.94  | -2.92  |
| YC   | 2.60     | 2.48   | 2.10   | 2.08   | 109.40             | 136.40 | 109.90 | 12.60  | 17.37  | 28.19  | 14.66  | 1.02   |
| XZ   | 2.47     | 2.03   | 2.23   | 2.00   | 85.80              | 403.40 | 45.20  | 2.40   | 14.11  | 24.05  | 10.22  | -4.13  |
| LL   | 2.83     | 2.58   | 2.90   | 2.92   | 122.90             | 301.90 | 67.30  | 5.70   | 14.64  | 24.21  | 10.28  | -3.65  |

Reference:

1. Shanxi Statistical Yearbook—2018. Available online: <http://tjj.shanxi.gov.cn/tjsj/tjnj/nj2018/indexch.htm> (accessed on 8 November 2021).
